CORRECTION

# Correction: Genetic variation in haemoglobin is associated with evolved changes in breathing in high-altitude deer mice

Catherine M. Ivy, Oliver H. Wearing, Chandrasekhar Natarajan, Rena M. Schweizer, Natalia Gutiérrez-Pinto, Jonathan P. Velotta, Shane C. Campbell-Staton, Elin E. Petersen, Angela Fago, Zachary A. Cheviron, Jay F. Storz and Graham R. Scott

There was an error in *J. Exp. Biol.* (2022) 225, jeb243595 (doi:10.1242/jeb.243595).

The key in Fig. 4 incorrectly showed the same genotype for each symbol. The corrected and original figure are shown below; both the online full-text and PDF versions have been corrected.

We apologise to the authors and readers for this error and any inconvenience it may have caused.

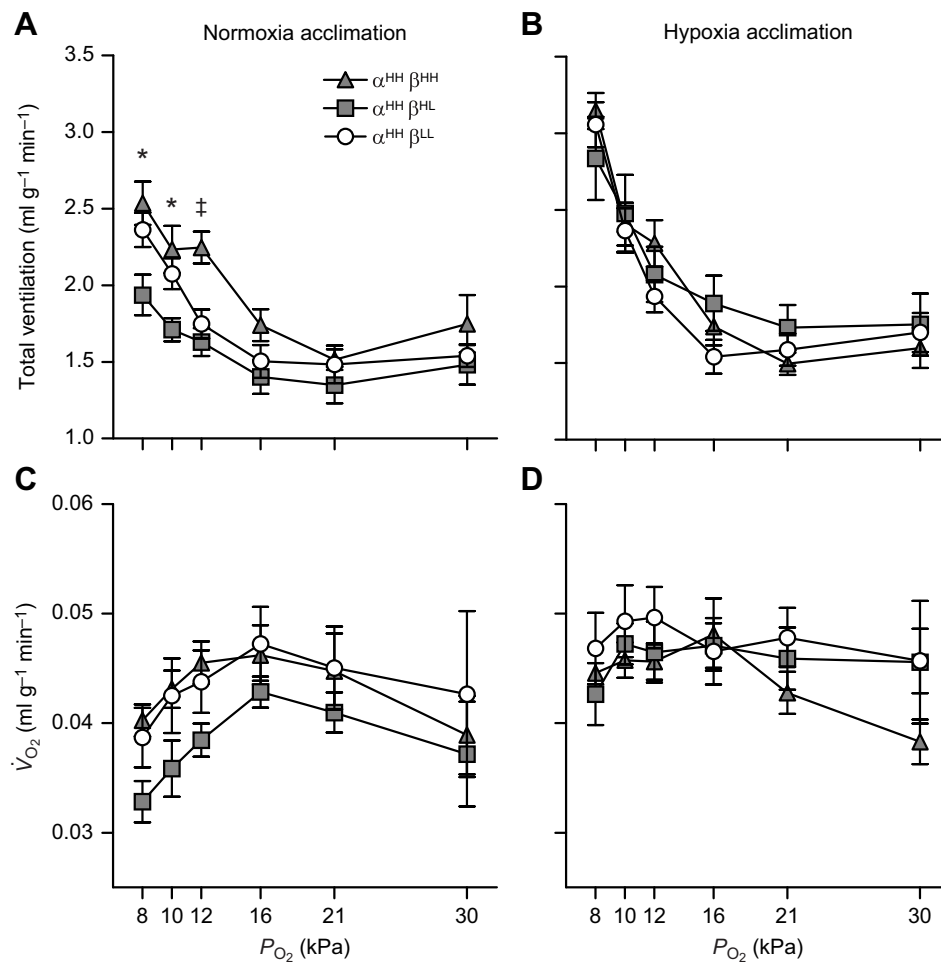

**Fig. 4 (corrected).**  $\beta$ -Globin genotype is associated with variation in the hypoxic ventilatory response in F2 hybrid deer mice before (left) but not after (right) hypoxia acclimation, without any significant association with  $\dot{V}_{O_2}$ . (A,B) Total ventilation and (C,D)  $\dot{V}_{O_2}$ . Genotypes are defined in Fig. 2. Values are means  $\pm$  s.e.m. ( $\alpha^{HH}\beta^{HH}$ ,  $N=5$ ;  $\alpha^{HH}\beta^{HL}$ ,  $N=5$ ;  $\alpha^{HH}\beta^{LL}$ ,  $N=7$ ). \*Significant pairwise differences within a  $P_{O_2}$  between  $\alpha^{HH}\beta^{HH}$  and  $\alpha^{HH}\beta^{HL}$ ; †significant pairwise differences between  $\alpha^{HH}\beta^{HH}$  and both  $\alpha^{HH}\beta^{HL}$  and  $\alpha^{HH}\beta^{LL}$  (Holm–Šidák post-tests).

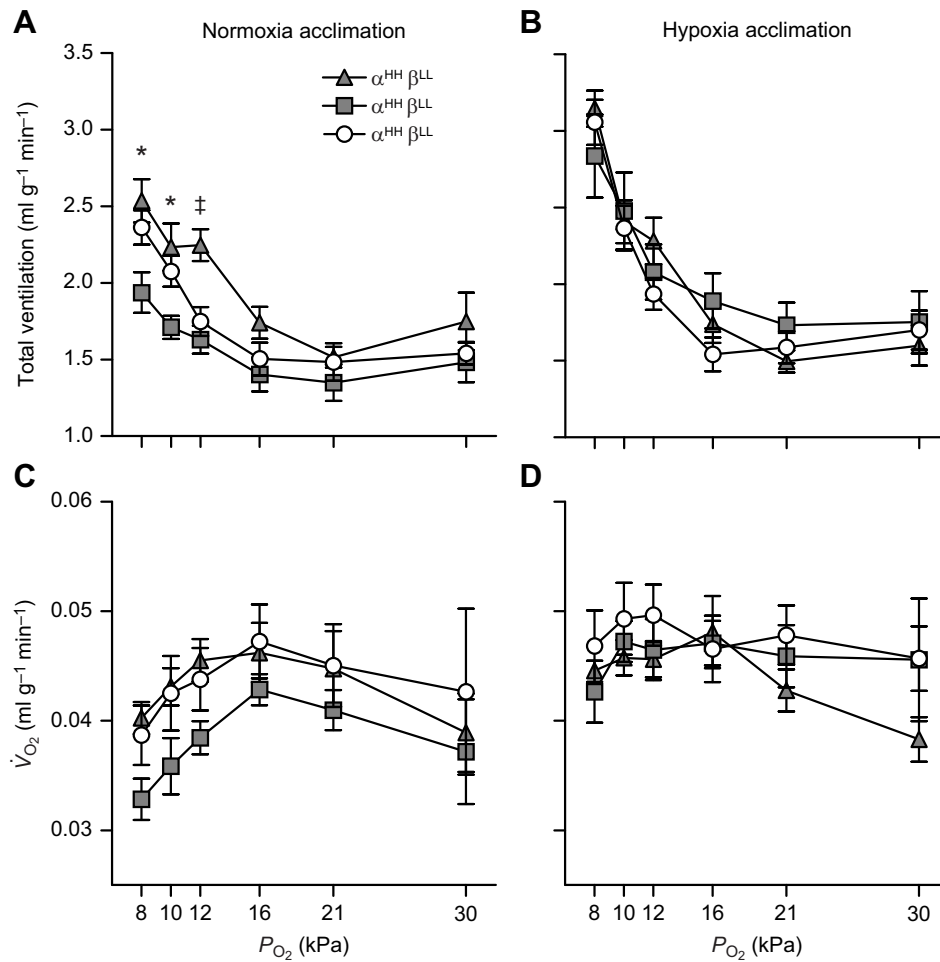

**Fig. 4 (original).**  $\beta$ -Globin genotype is associated with variation in the hypoxic ventilatory response in F2 hybrid deer mice before (left) but not after (right) hypoxia acclimation, without any significant association with  $\dot{V}_{O_2}$ . (A,B) Total ventilation and (C,D)  $\dot{V}_{O_2}$ . Genotypes are defined in Fig. 2. Values are means  $\pm$  s.e.m. ( $\alpha^{HH}\beta^{HH}$ ,  $N=5$ ;  $\alpha^{HH}\beta^{HL}$ ,  $N=5$ ;  $\alpha^{HH}\beta^{LL}$ ,  $N=7$ ). \*Significant pairwise differences within a  $P_{O_2}$  between  $\alpha^{HH}\beta^{HH}$  and  $\alpha^{HH}\beta^{HL}$ ; #significant pairwise differences between  $\alpha^{HH}\beta^{HH}$  and both  $\alpha^{HH}\beta^{HL}$  and  $\alpha^{HH}\beta^{LL}$  (Holm-Šidák post-tests).
